# Supplementary material for: Tubeless biochip for chemical stimulation of cells in closed-bioreactors: anti-cancer activity of the catechin–dextran conjugate
Source: Royal Society of Chemistry journal article supplement (doi:10.1039/c4ra05496b), 2014-01-01
Supplement: c4ra05496b1.pdf [file c4ra05496b1.pdf]

## Supplementary material

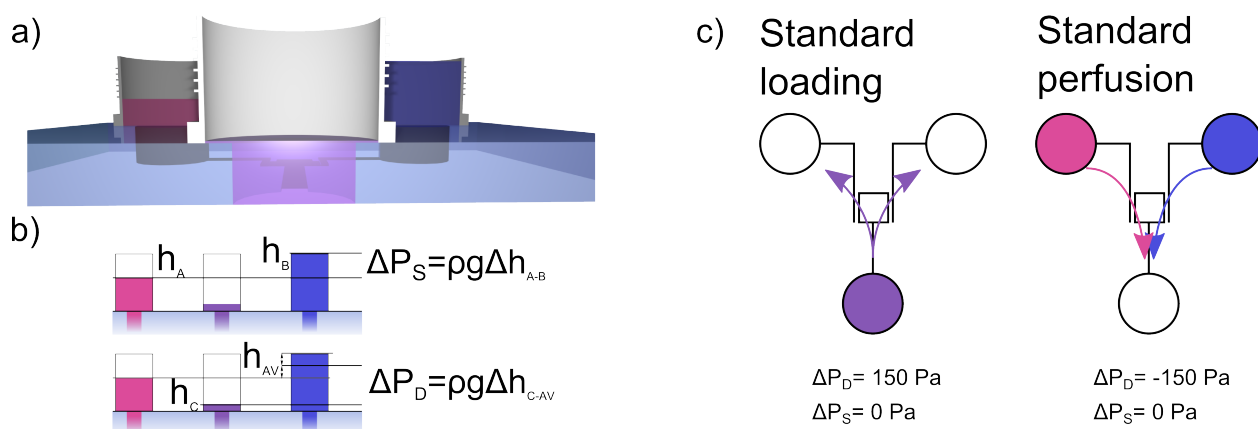

Supplementary Figure 1. Open liquid reservoirs and gravity-driven pressurization. a) Schematics of the liquid-reservoir architecture and b) graphical representation of input pressures configurations. c) Pressure configurations used for cell loading and perfusion.

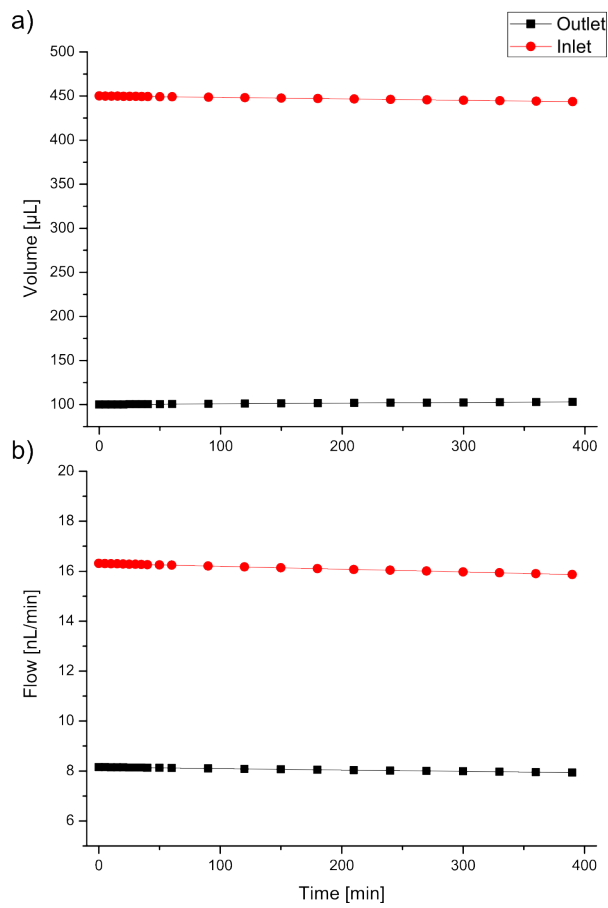

Supplementary Figure 2: Fluidic stability during symmetric perfusion ( $\Delta P_D = 150$  Pa,  $\Delta P_S = 0$  Pa).

a) Calculated liquid reservoir volume (a) and flow rate (b) as a function of time.

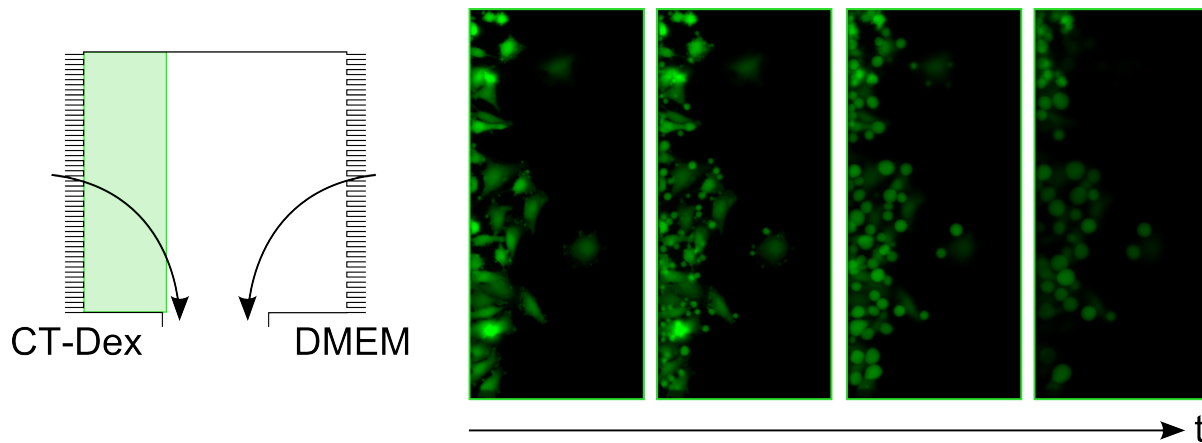

Supplementary Figure 3: Time-lapse microscopy of the Calcein AM fluorescence signal from the MC area close to the CT-Dex administration side (green rectangle on the left).  $100 < t < 240$  min.  $t = 0$  corresponds to the onset of CT-Dex administration.

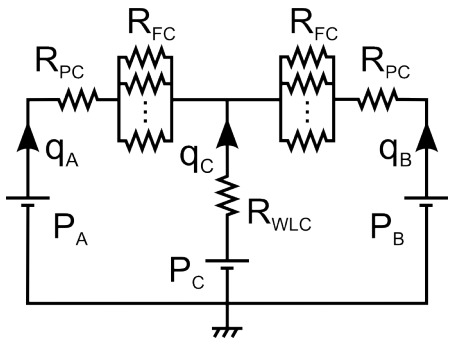

Supplementary Figure 4. Equivalent electrical circuit.

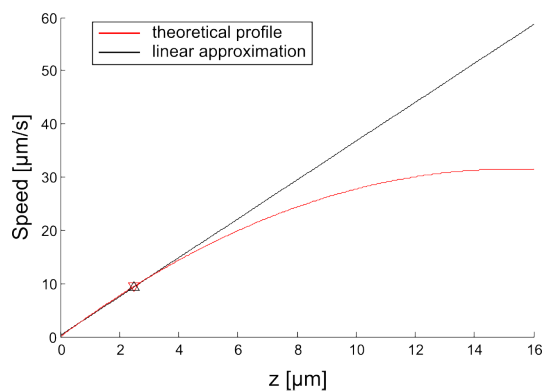

Supplementary Figure 5: Speed profile (red line) in the MC as a function of the distance from the bottom layer ( $z$ ). Black line represents the linear approximation of the speed profile. The difference between the two curves at  $z = 2.5 \mu\text{m}$  (diamonds) is lower than 1%.
